# Supplementary material
Source: publisher figshare collection journal article supplement (https://acs.figshare.com/ndownloader/files/3986824)
Supplement: Supplementary file 1 [file 3986824]

# Supporting information for

## Controlling the Dipole-Dipole Interactions between Tb(III)-Phthalocyaninato Triple-Decker Moieties through Spatial Control Using a Fused Phthalocyaninato Ligand

*Takaumi Morita,<sup>§</sup> Keiichi Katoh,<sup>\*§†</sup> Brian K. Breedlove,<sup>§</sup> and Masahiro Yamashita<sup>\*§†</sup>*

<sup>§</sup> Department of Chemistry, Graduate School of Science, Tohoku University, 6-3, Aramaki-Aza-Aoba, Aoba-ku, Sendai, Miyagi 980-8578, Japan.

<sup>†</sup>CREST, JST, 4-1-8, Honcho, Kawaguchi, Saitama 332-0012, Japan.

yamasita@agnus.chem.tohoku.ac.jp

### Contents

- Synthesis scheme of terbium(III) double-decker Tb(obPc)<sub>2</sub>: S1
- Synthesis scheme of the fused phthalocyanine: S1
- ESI-MS spectrum for [Tb<sub>4</sub>]: S2
- IR spectra for [Tb<sub>4</sub>]: S3
- UV spectra for [Tb<sub>4</sub>]: S3
- DC magnetic susceptibility for [Tb<sub>4</sub>], **1** and **2**: S4
- *M-H* curve for [Tb<sub>4</sub>]: S4
- Arrhenius plot for [Tb<sub>4</sub>]: S5
- AC magnetic susceptibility for **1**: S6
- Arrhenius plot made by ac magnetic susceptibility measurements for **1**: S7
- AC magnetic susceptibility for **2**: S8
- Arrhenius plot made by ac magnetic susceptibility measurements for **2**: S9
- Argand plot for **1** at 0 T: S10
- Argand plot for **1** at 0.4 T: S11
- $\tau$  vs.  $T^{-1}$  plot for **1** at 0 and 0.4 T: S12
- Argand plot for **1** at 5 K: S13
- $\tau$  vs.  $H$  plot for **1** at 5K: S14
- Argand plot for **2** at 0 T: S15
- Argand plot for **2** at 0.4 T: S16
- $\tau$  vs.  $T^{-1}$  plot for **2** at 0 and 0.4 T: S17
- The equations of the generalized and extended Debye models: S18

• Synthesis of terbium(III) double-decker  $\text{Tb}(\text{obPc})_2$

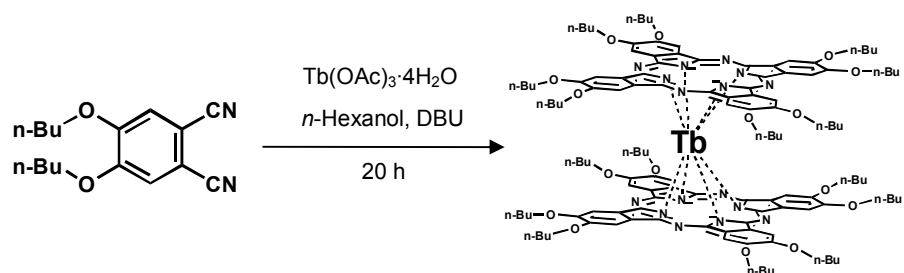

**Scheme S1** Synthesis of Terbium(III) double-decker  $\text{Tb}(\text{obPc})_2$

• Synthesis of the fused phthalocyanine

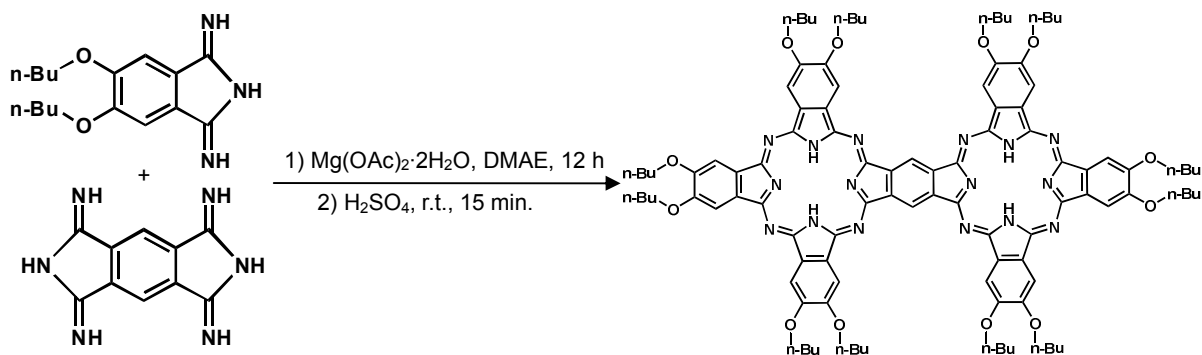

**Scheme S2** Synthesis of the fused phthalocyanine ligand.

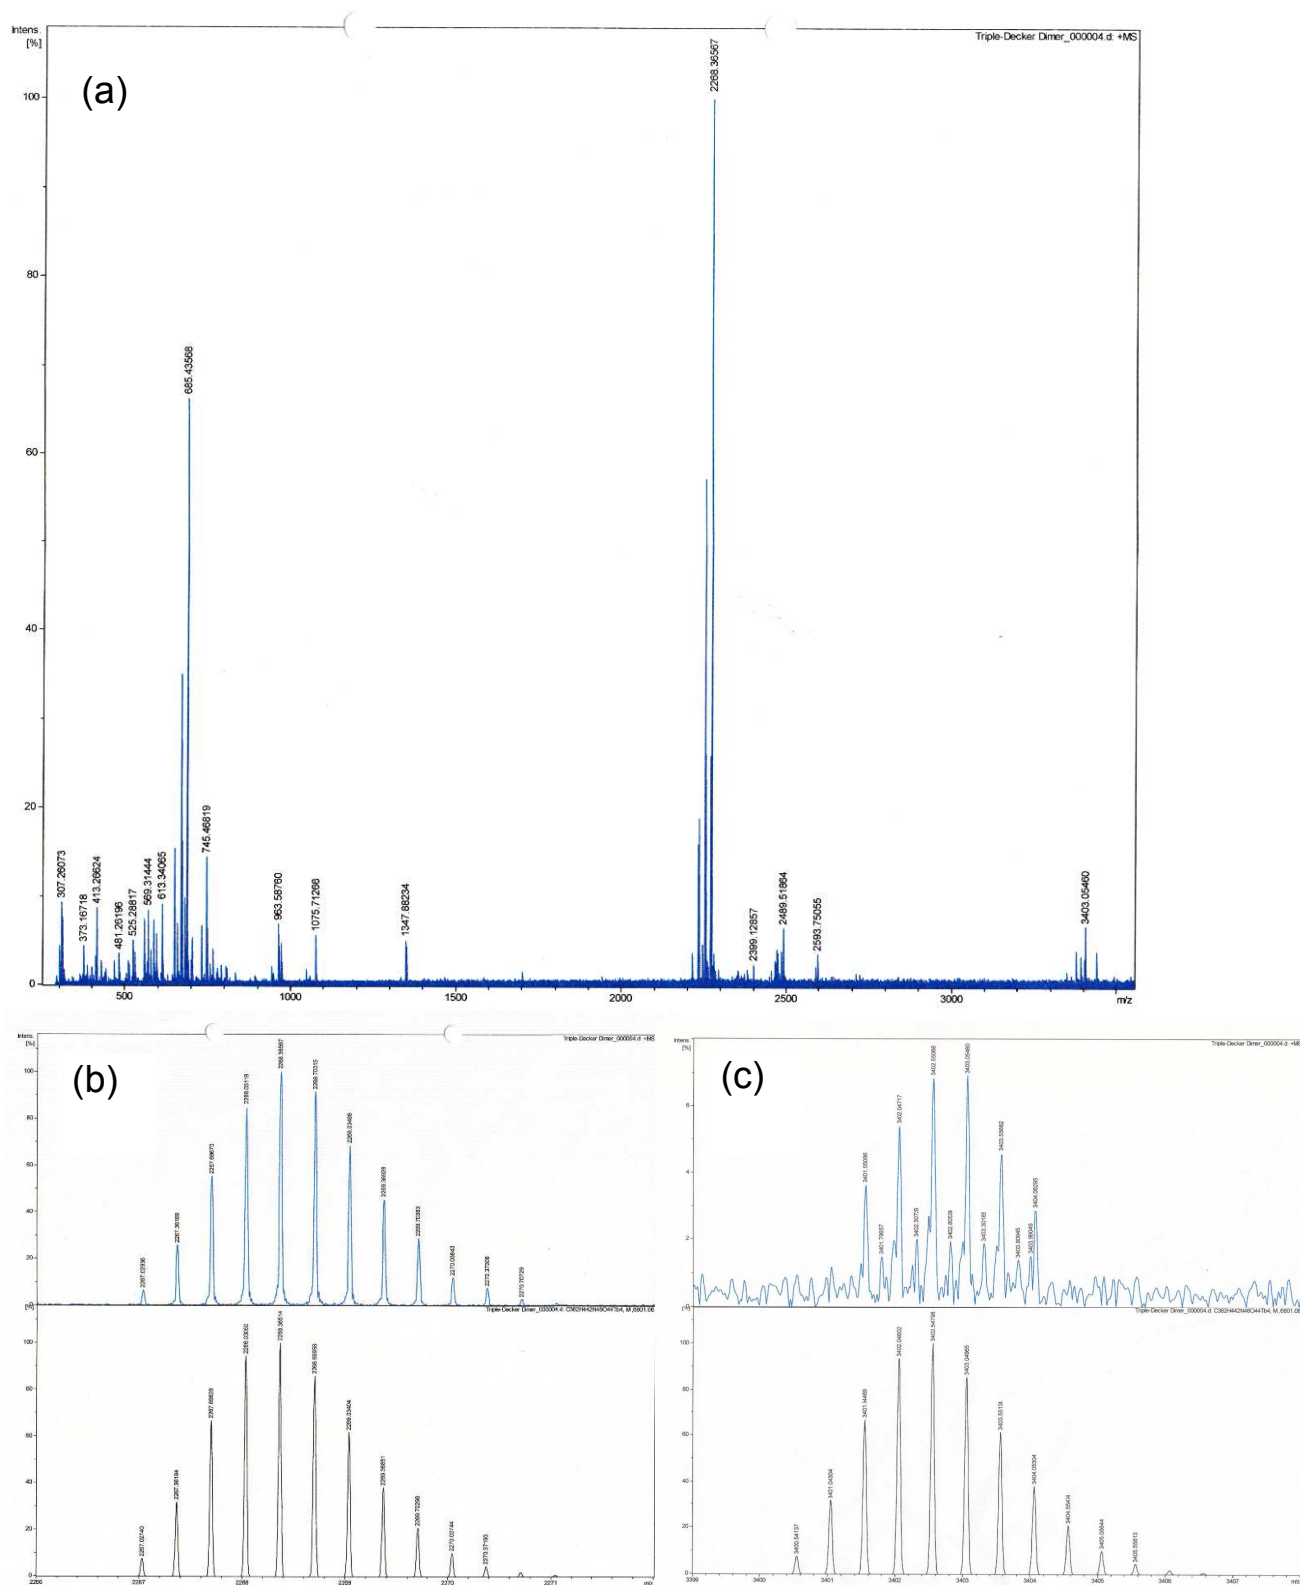

**Figure S1.** (a) ESI-MS spectrum of  $[Tb_4]$  in chloroform. The peak at 2268.37 corresponds to  $[M^{3+}]$  and 3403.06 corresponds to  $[(M+H)^{2+}]$ . (b) Experimental (top) and calculated (bottom) isotope distribution for  $[M^{3+}]$ . (c) Experimental (top) and calculated (bottom) isotope distribution for  $[(M+H)^{2+}]$ .

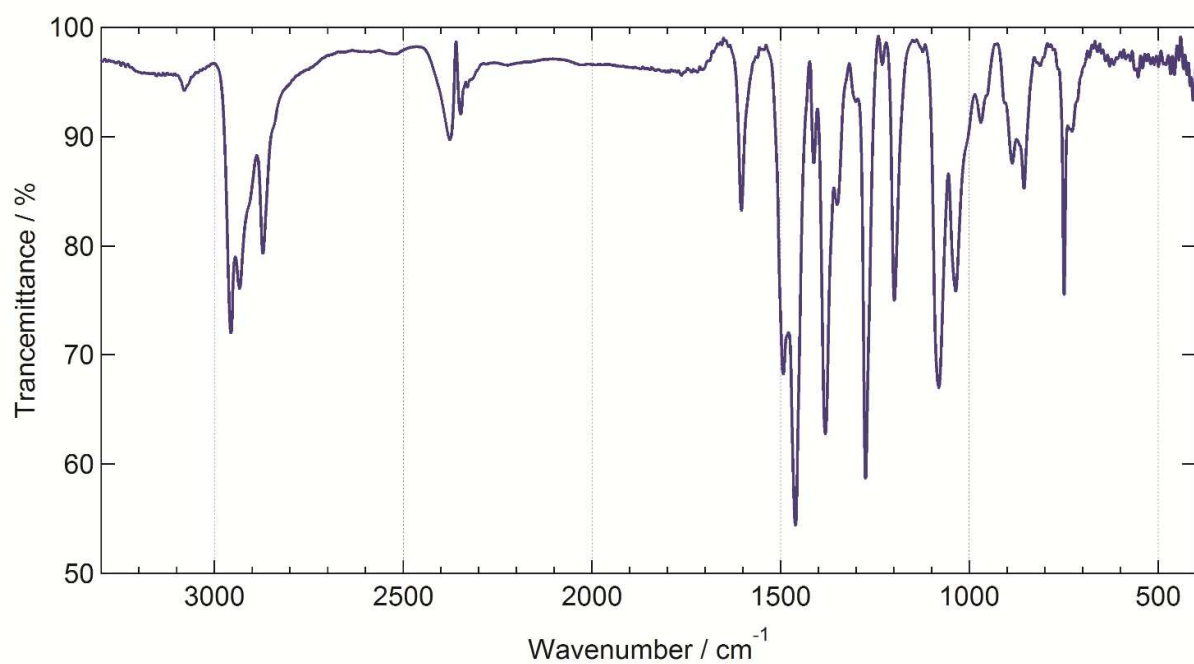

**Figure S2.** FT-IR spectra of **[Tb<sub>4</sub>]** as KBr Pellets at 298 K.

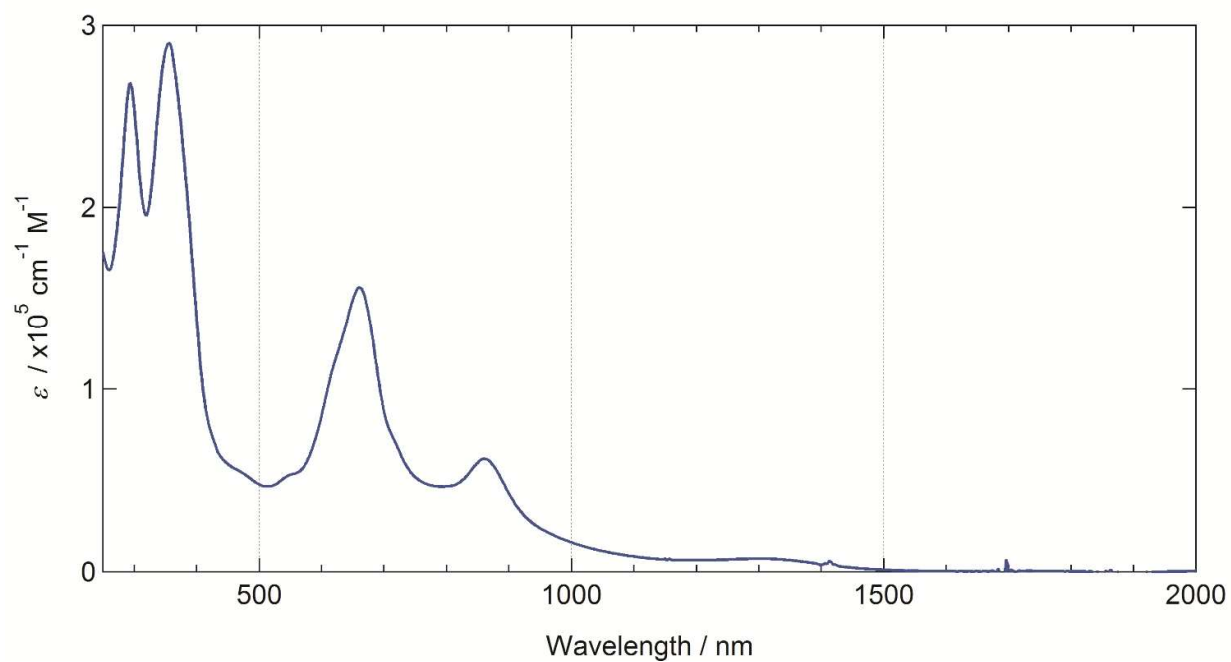

**Figure S3.** Absorbance spectrum of **[Tb<sub>4</sub>]** in CHCl<sub>3</sub> ( $8.2 \times 10^{-6}$  M) at 298 K.

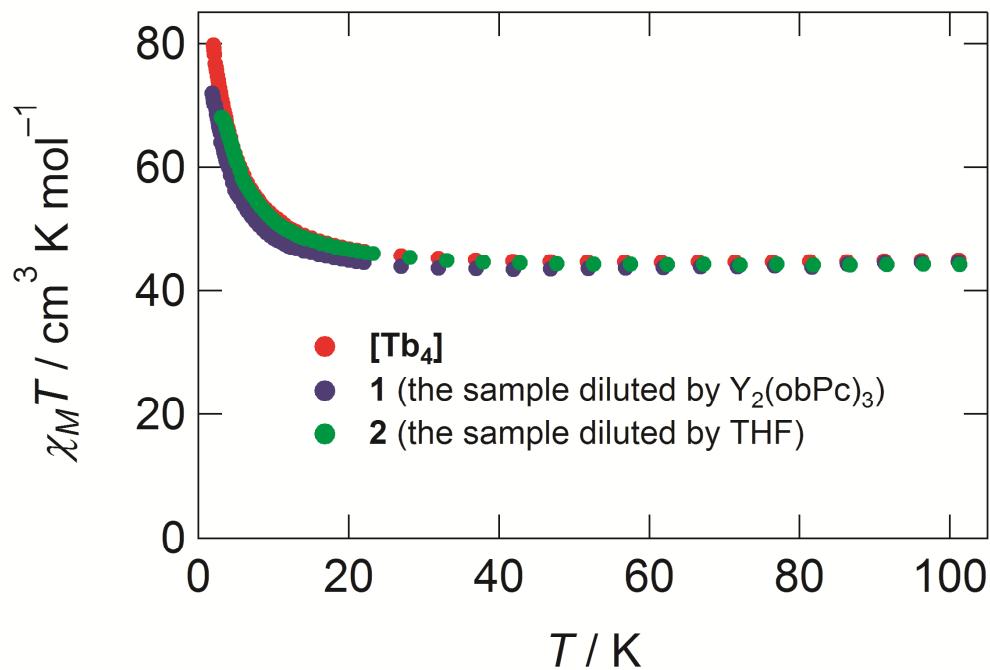

**Figure S4.** Comparison of the dc magnetic susceptibility of **[Tb<sub>4</sub>]** (red dots) with **1** (the sample diluted by Y<sub>2</sub>(obPc)<sub>3</sub> matrix, purple dots) and **2** (the sample diluted by THF matrix, green dots). The dc magnetic measurements were performed under the same conditions as those of **[Tb<sub>4</sub>]**.

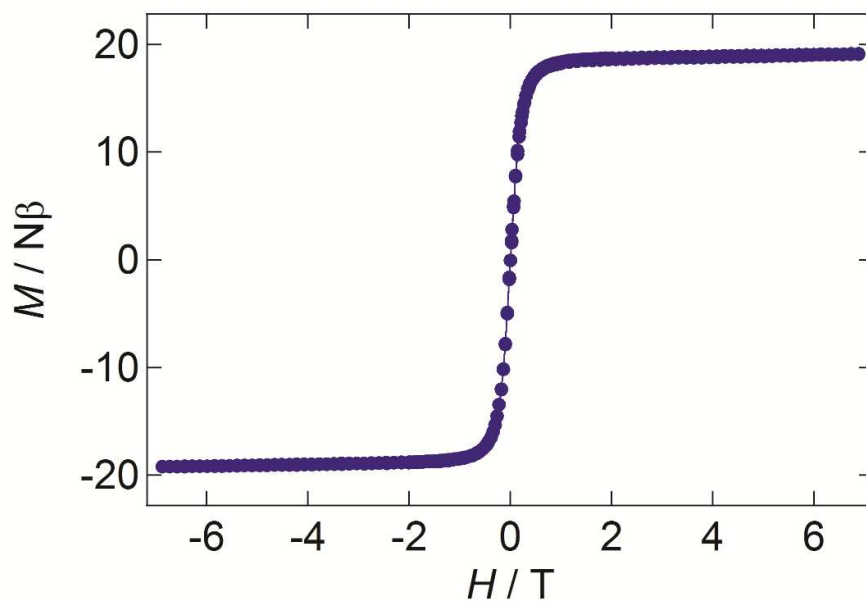

**Figure S5.**  $M$ - $H$  curve for **[Tb<sub>4</sub>]**. No hysteresis was observed. Each point was measured every 0.035 T (−1–1 T) and 0.15 T (−7–1 T, 1–7 T).

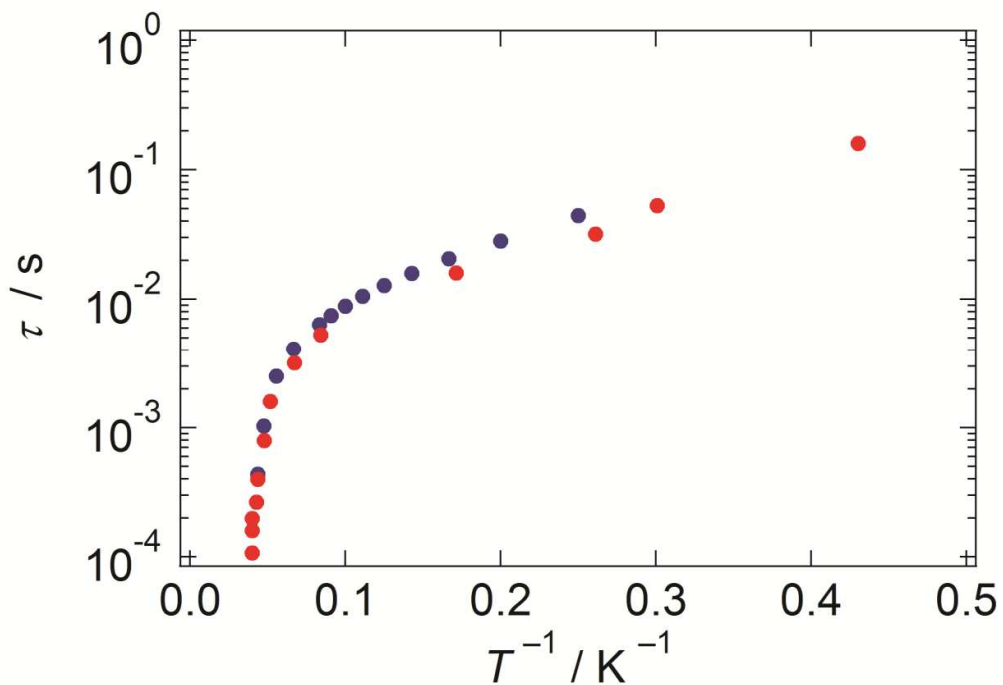

**Figure S6.** Arrhenius plot for **[Tb<sub>4</sub>]** in a dc field of 0 T. The purple dots were plotted by using fitted parameter of the plot in Figure S11, and the red ones were plotted by using  $\chi_M''T$  peaks from the temperature and frequency dependence measurements. These two plots are consistent with each other.

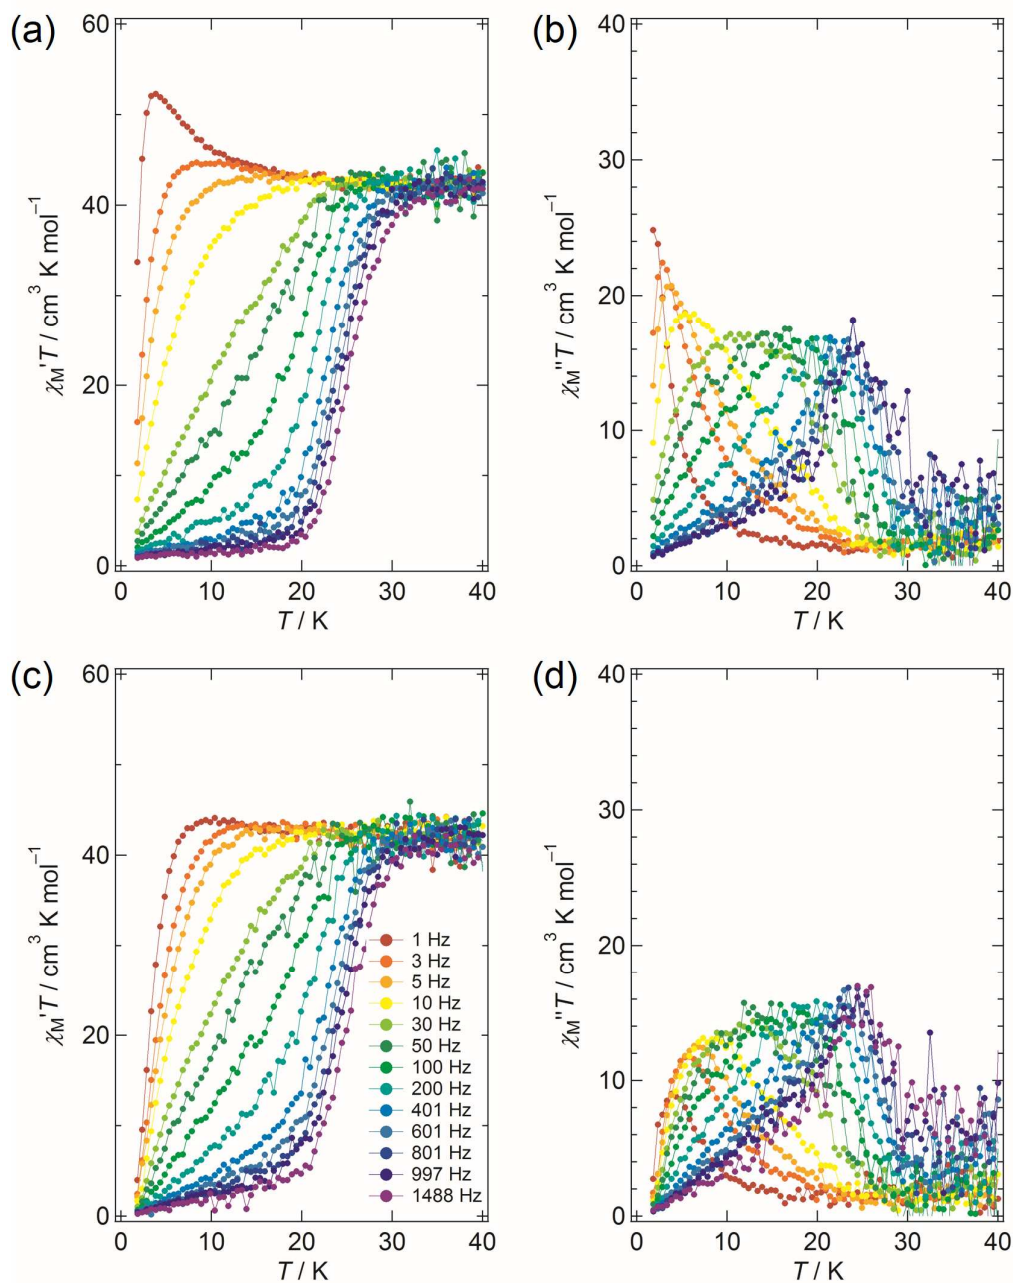

**Figure S7.** Frequency ( $f$ ) and temperature ( $T$ ) dependences of (a),(c) the real and (b),(d) imaginary parts of the ac magnetic susceptibility for **1**. (a) and (b) were measured in absence of a magnetic field, and (c) and (d) were done in the presence of a magnetic field of 0.4 T. In all graphs, the solid lines are guides for the eyes.

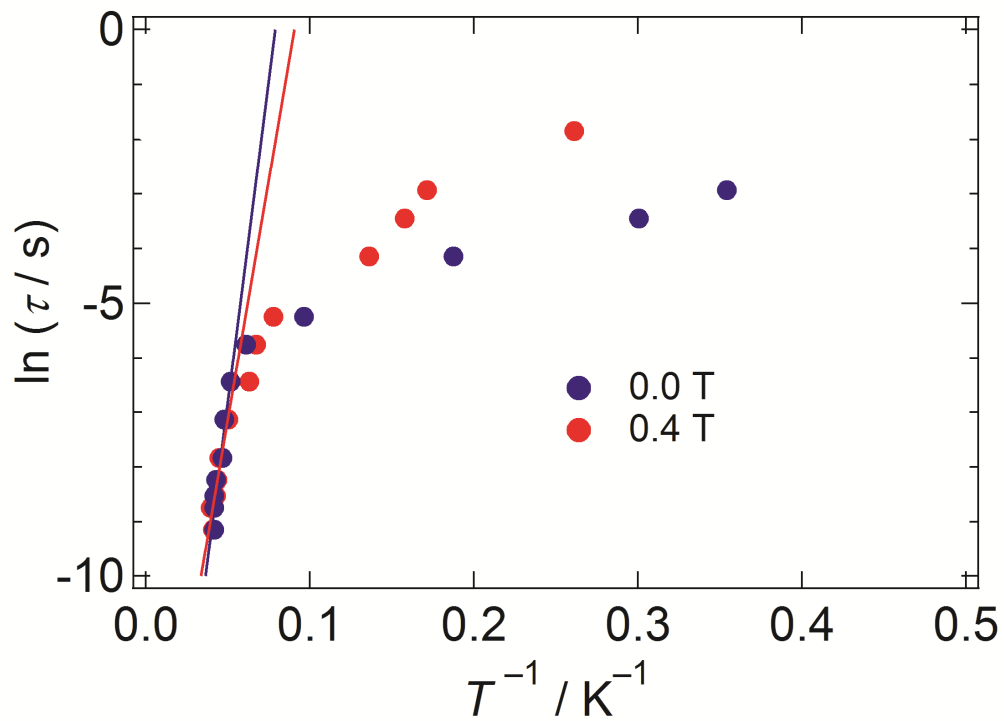

**Figure S8.** Arrhenius plot made by using the data of Figure S7. The straight lines are least square fits of the data, which yielded the following parameters:  $\Delta/hc = 164 \text{ cm}^{-1}$ ,  $\tau_0 = 8.3 \times 10^{-9} \text{ s}$  at 0 T, and  $\Delta/hc = 122 \text{ cm}^{-1}$ ,  $\tau_0 = 1.2 \times 10^{-7} \text{ s}$  at 0.4 T.



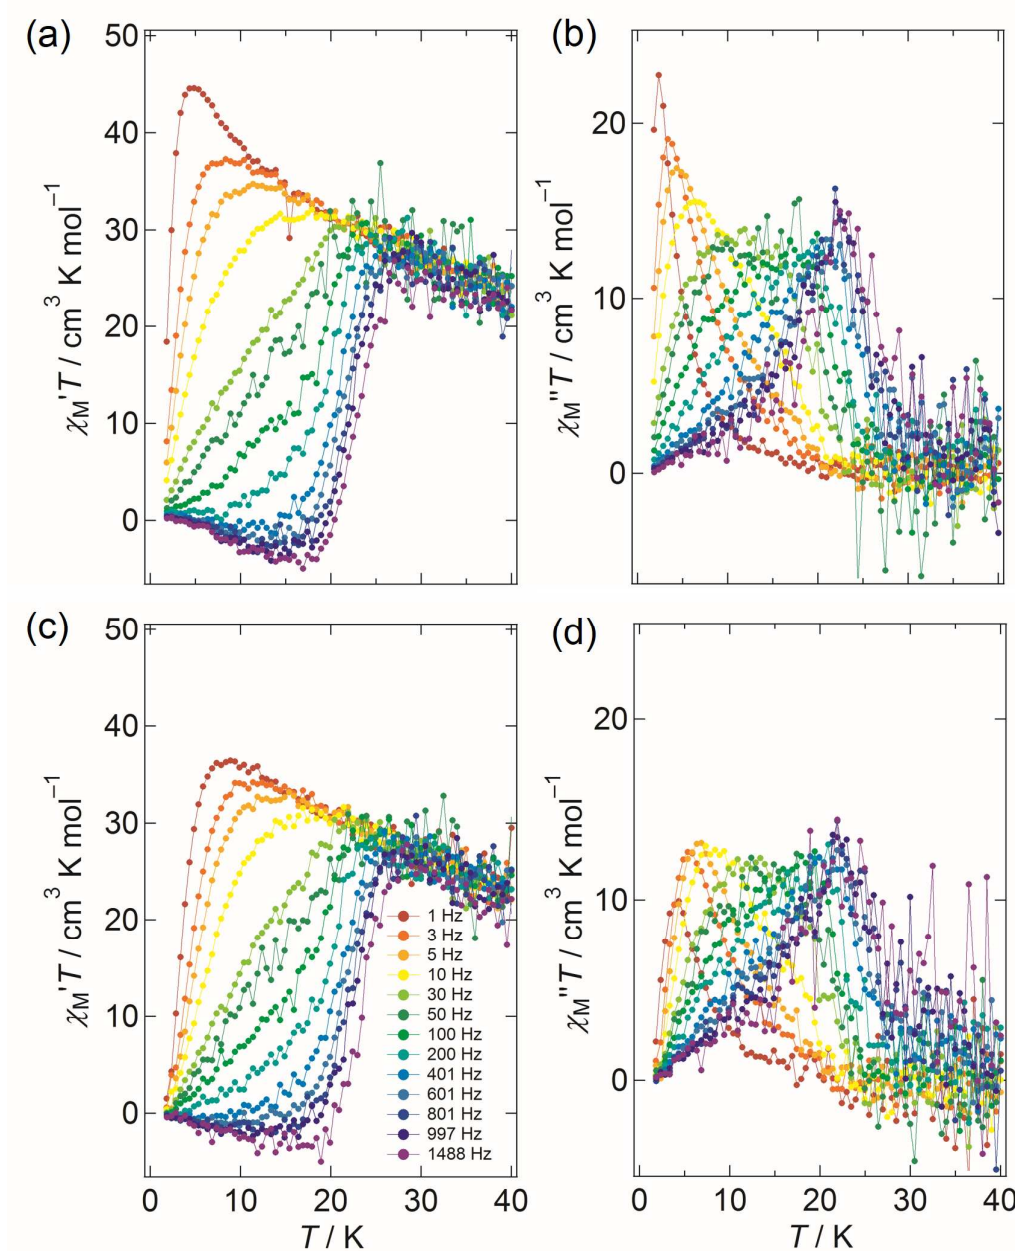

**Figure S9.** Frequency ( $f$ ) and temperature ( $T$ ) dependences of (a),(c) the real and (b),(d) imaginary parts of the ac magnetic susceptibility for **2**. (a) and (b) were measured in absence of a magnetic field, and (c) and (d) were done in the presence of a magnetic field of 0.4 T. In all graphs, the solid lines are guides for the eyes.

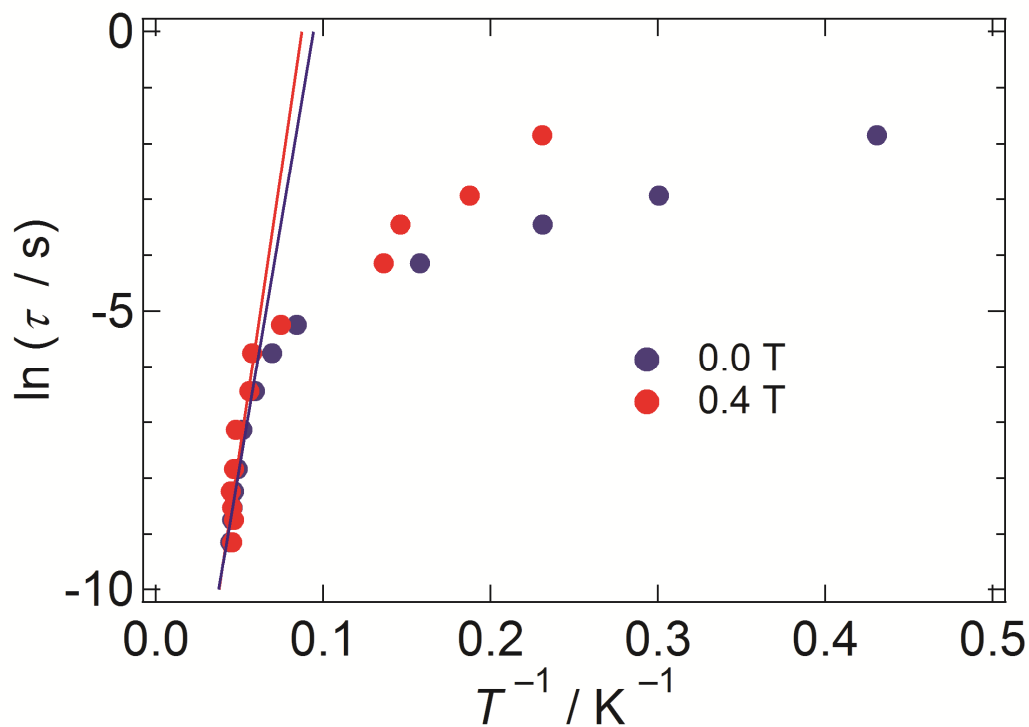

**Figure S10.** Arrhenius plot made by using the data of Figure S9. The straight lines are least square fits of the data, which yielded the following parameters:  $\Delta/hc = 123 \text{ cm}^{-1}$ ,  $\tau_0 = 5.8 \times 10^{-8} \text{ s}$  at 0 T, and  $\Delta/hc = 141 \text{ cm}^{-1}$ ,  $\tau_0 = 2.2 \times 10^{-8} \text{ s}$  at 0.4 T.

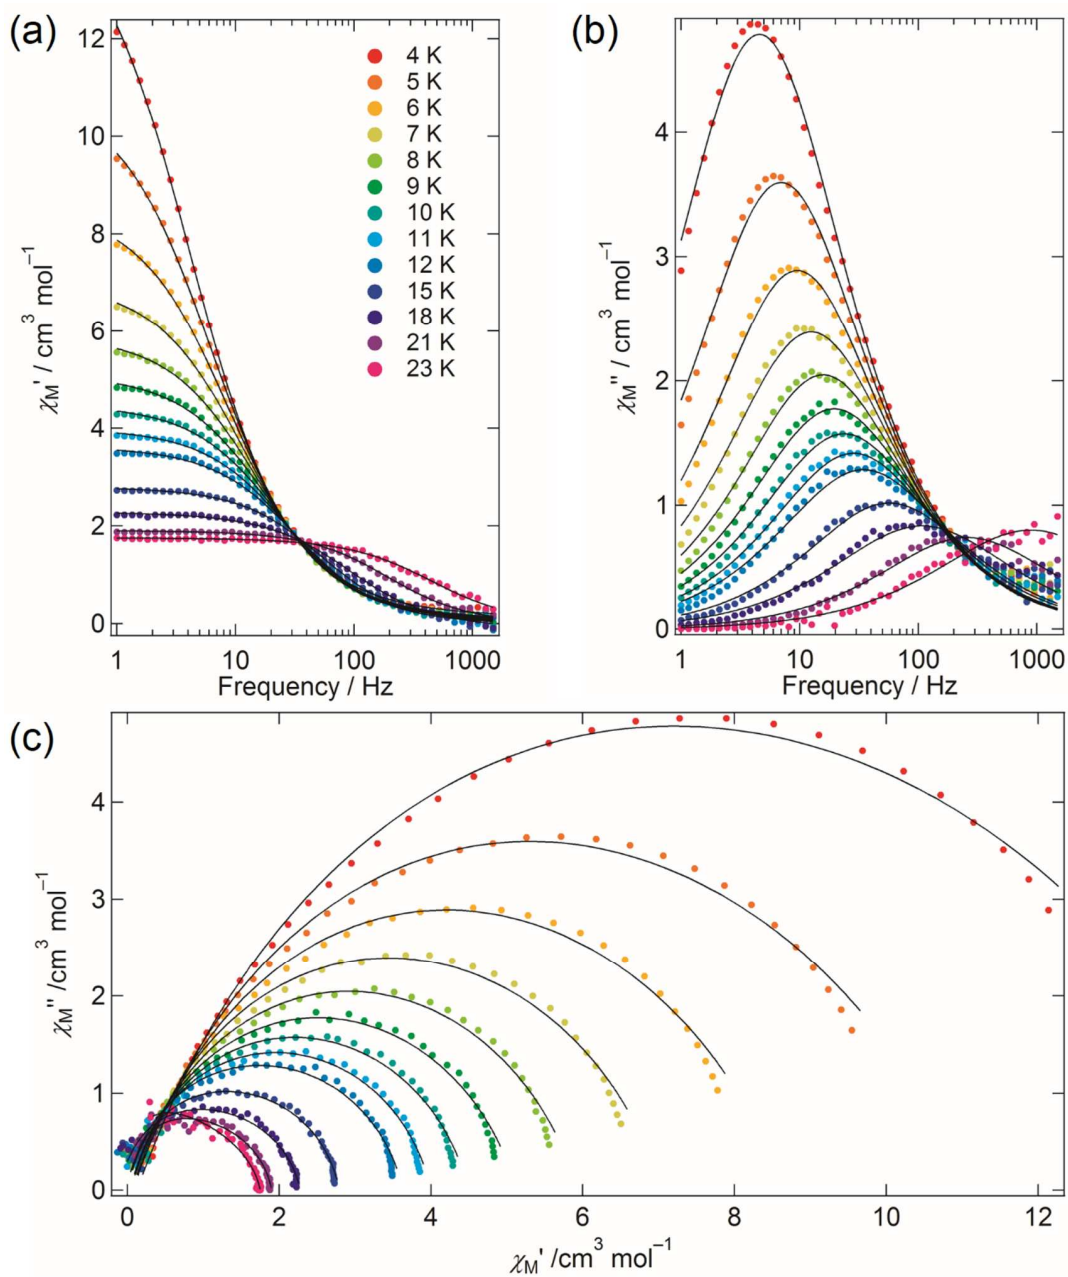

**Figure S11.** a)  $\chi_M'$  and b)  $\chi_M''$  versus  $f$  plots at 0 T and c) Argand plot for **1**. Black solid lines were fitted by using a generalized Debye model.

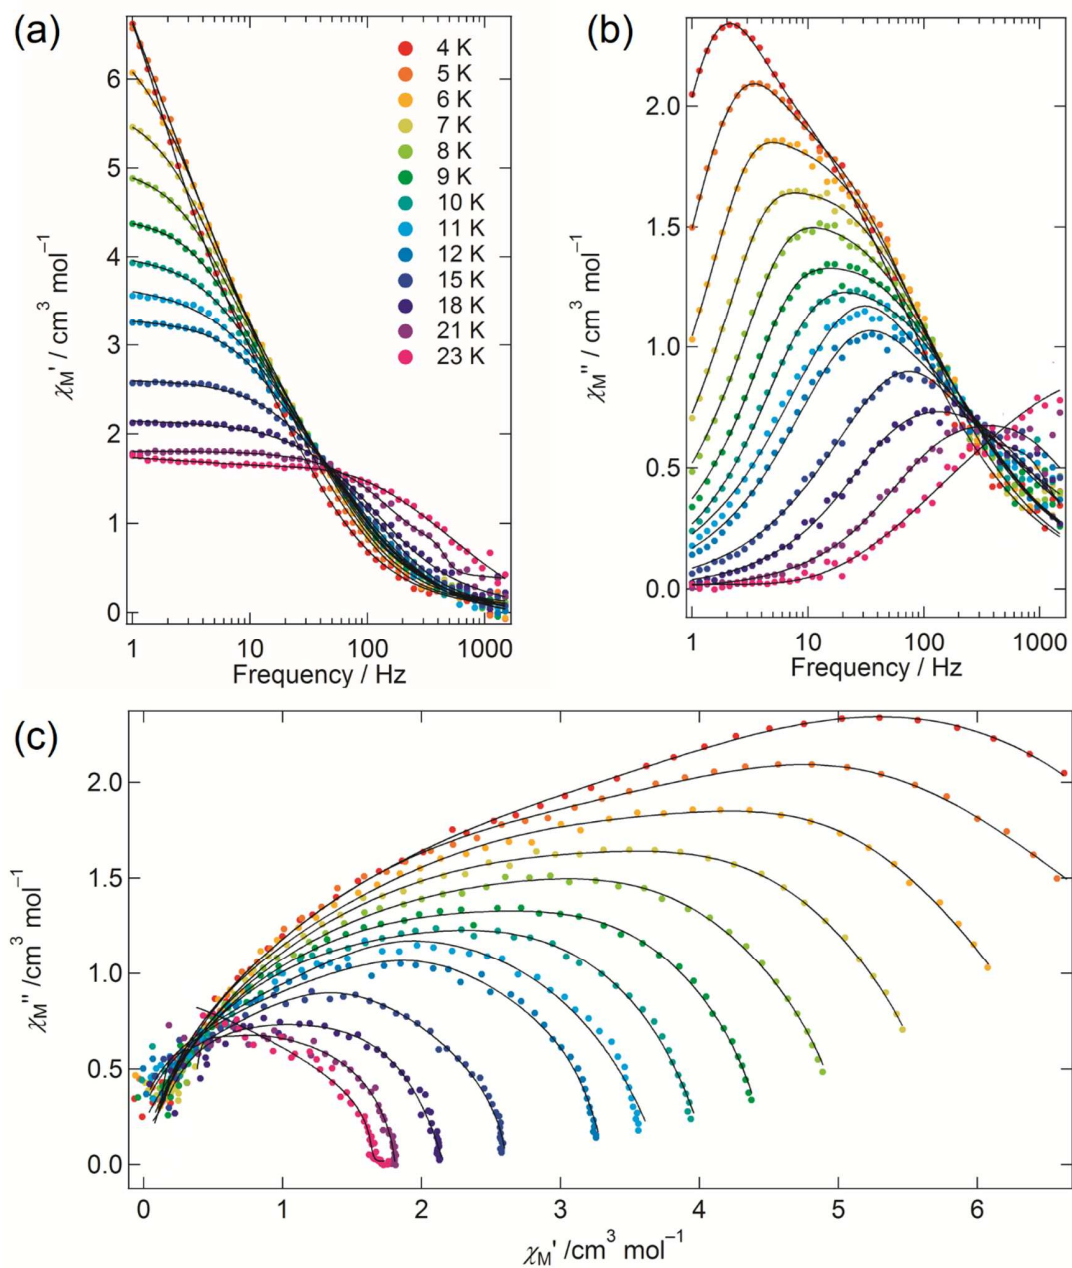

**Figure S12.** a)  $\chi_M'$  and b)  $\chi_M''$  versus  $f$  plots at 0.4 T and c) Argand plot for **1**. Black solid lines were fitted by using an extended Debye model.

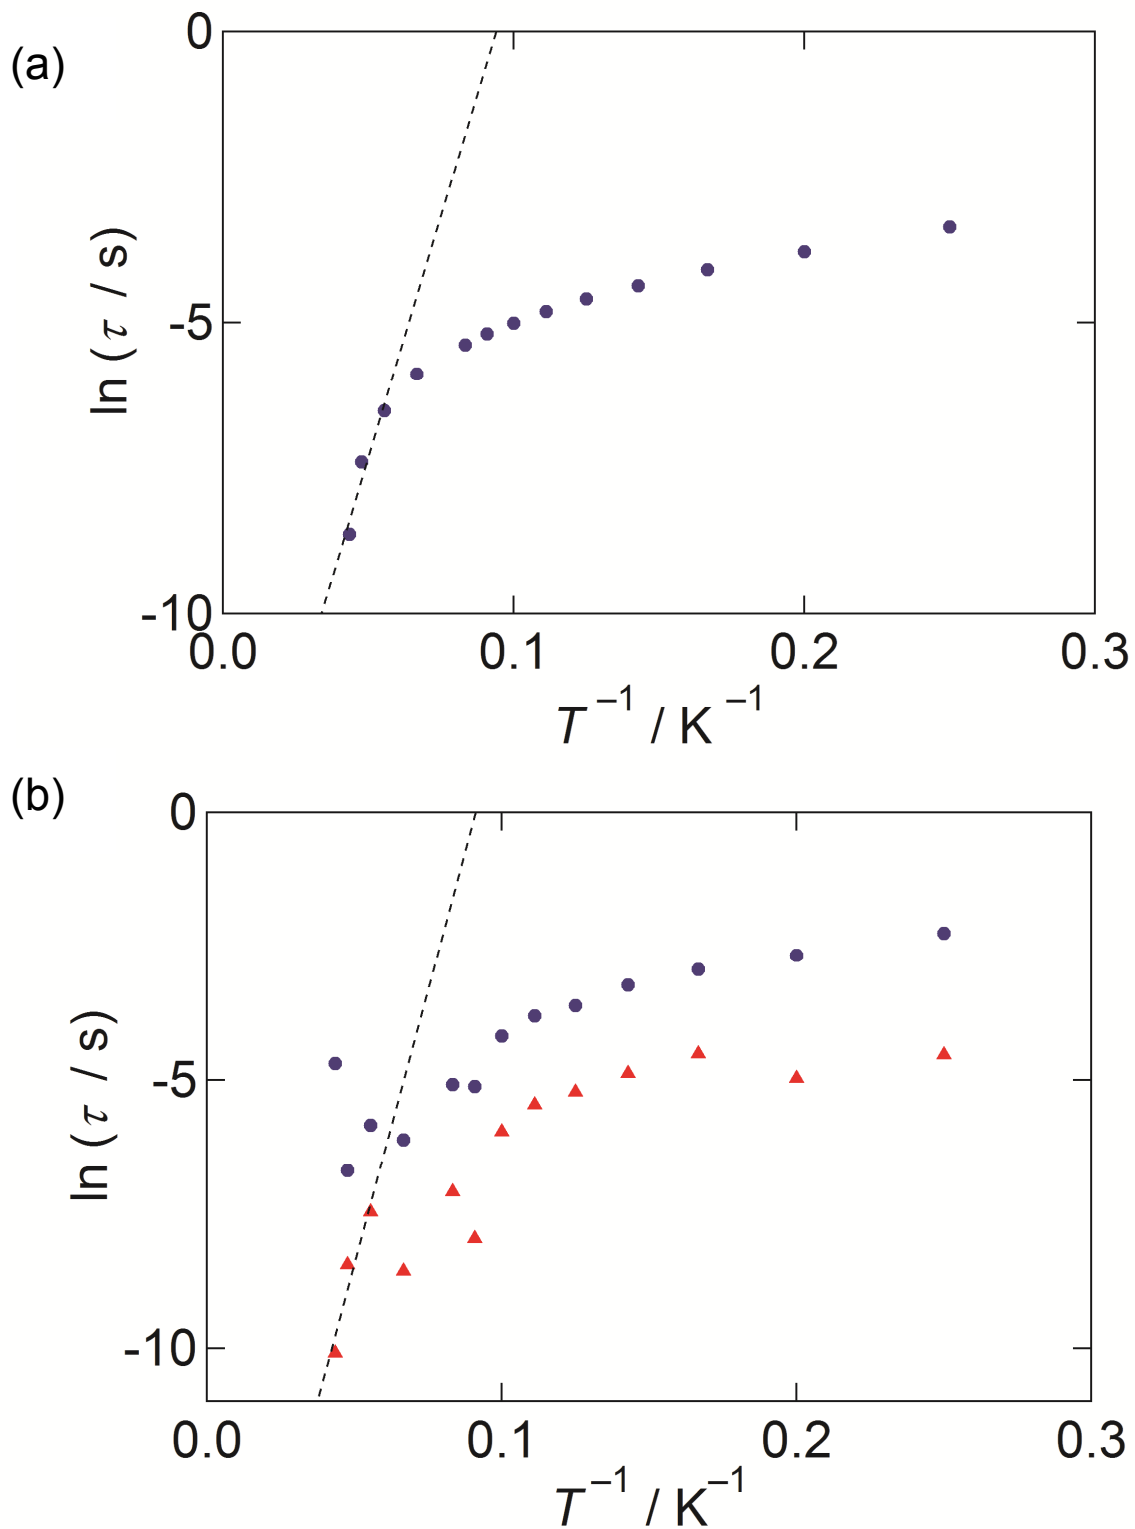

**Figure S13.** Arrhenius plot made by using the data of Figure (a) S11 and (b) S12 ( $\tau_1$ : high- $f$  part, red triangles,  $\tau_2$ : low- $f$  part, purple dots). Linear fitted parameters are as follows: (a)  $\Delta E = 116 \text{ cm}^{-1}$ ,  $\tau_0 = 1.6 \times 10^{-7} \text{ s}$ , (b)  $\Delta E = 143 \text{ cm}^{-1}$ ,  $\tau_0 = 7.7 \times 10^{-9} \text{ s}$  for  $\tau_2$ .  $\tau_1$  could not be fitted.

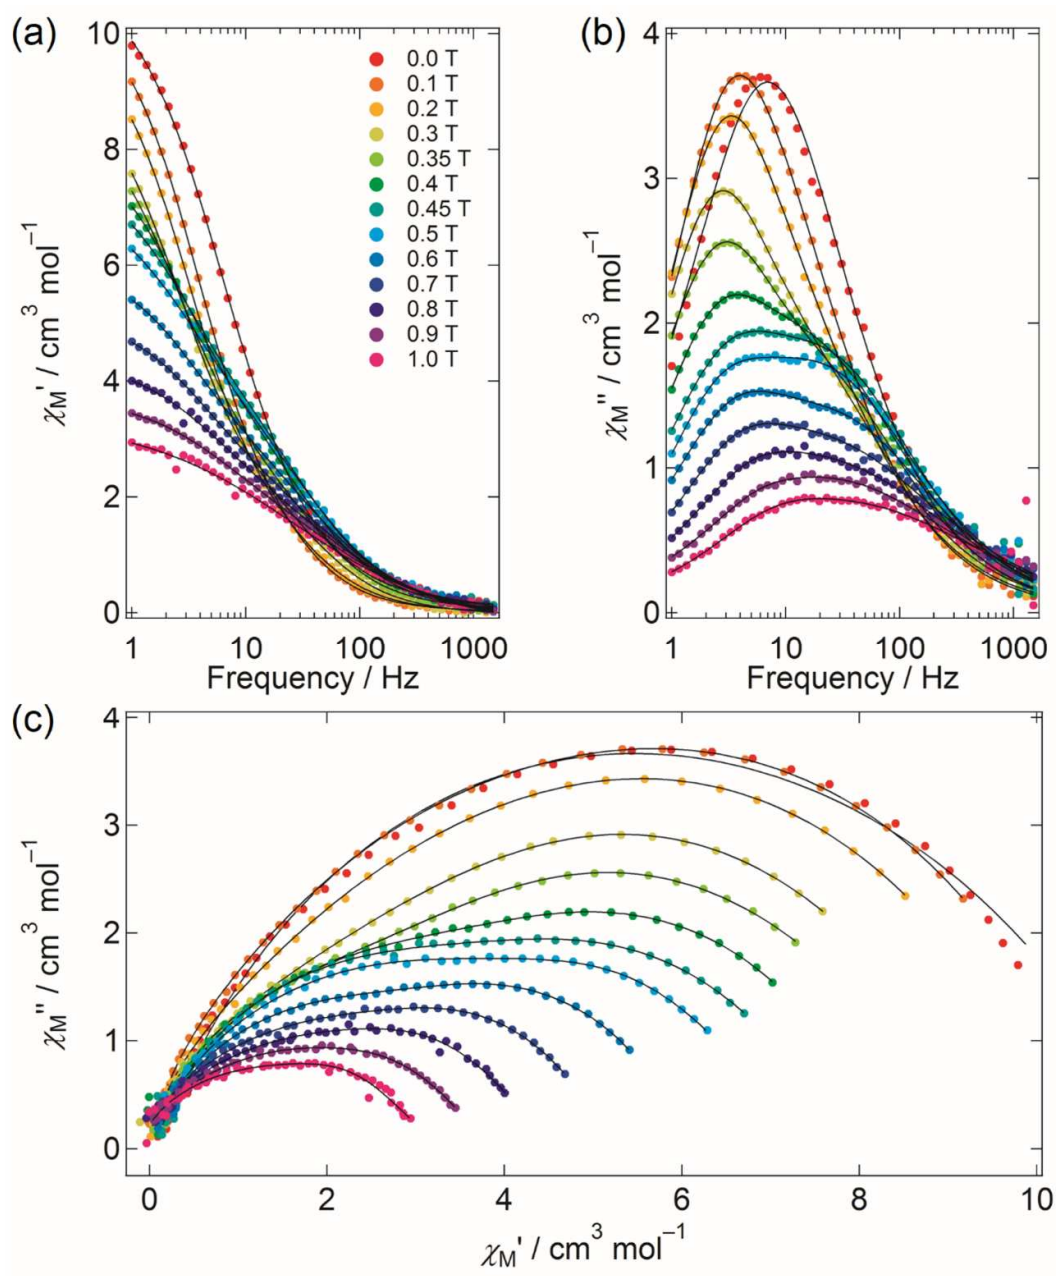

**Figure S14.** a)  $\chi_M'$  and b)  $\chi_M''$  versus  $f$  plots at 5 K and c) Argand plot for **1**. Black solid lines were fitted by using generalized and extended Debye models.

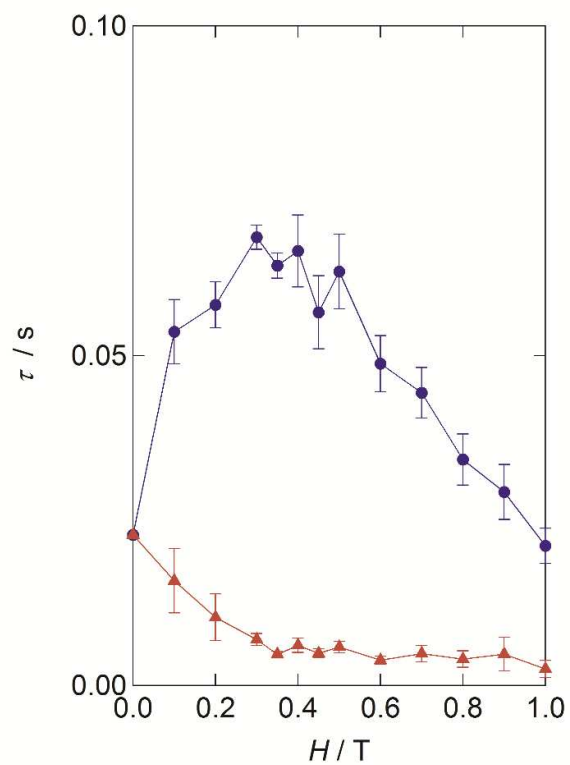

**Figure S15.** Relaxation time ( $\tau$ ) versus magnetic field plot by using parameters obtained from the Argand plots (Figure S14).



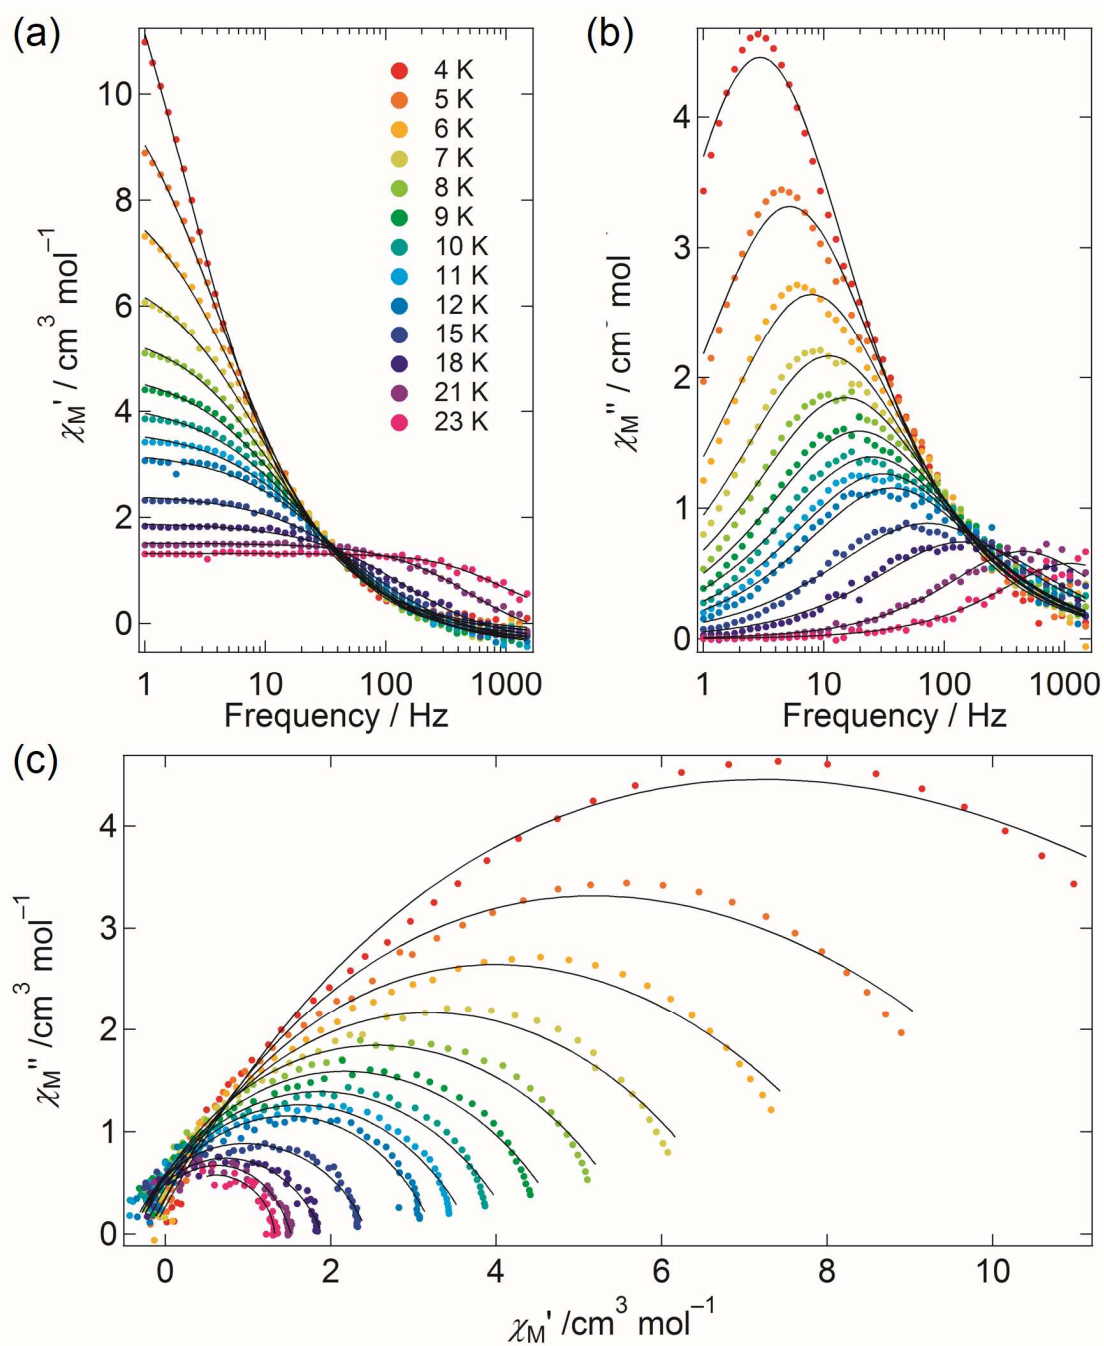

**Figure S16.** a)  $\chi_M'$  and b)  $\chi_M''$  versus  $f$  plots at 0 T and c) Argand plot for **2**. Black solid lines were fitted by using a generalized Debye model.



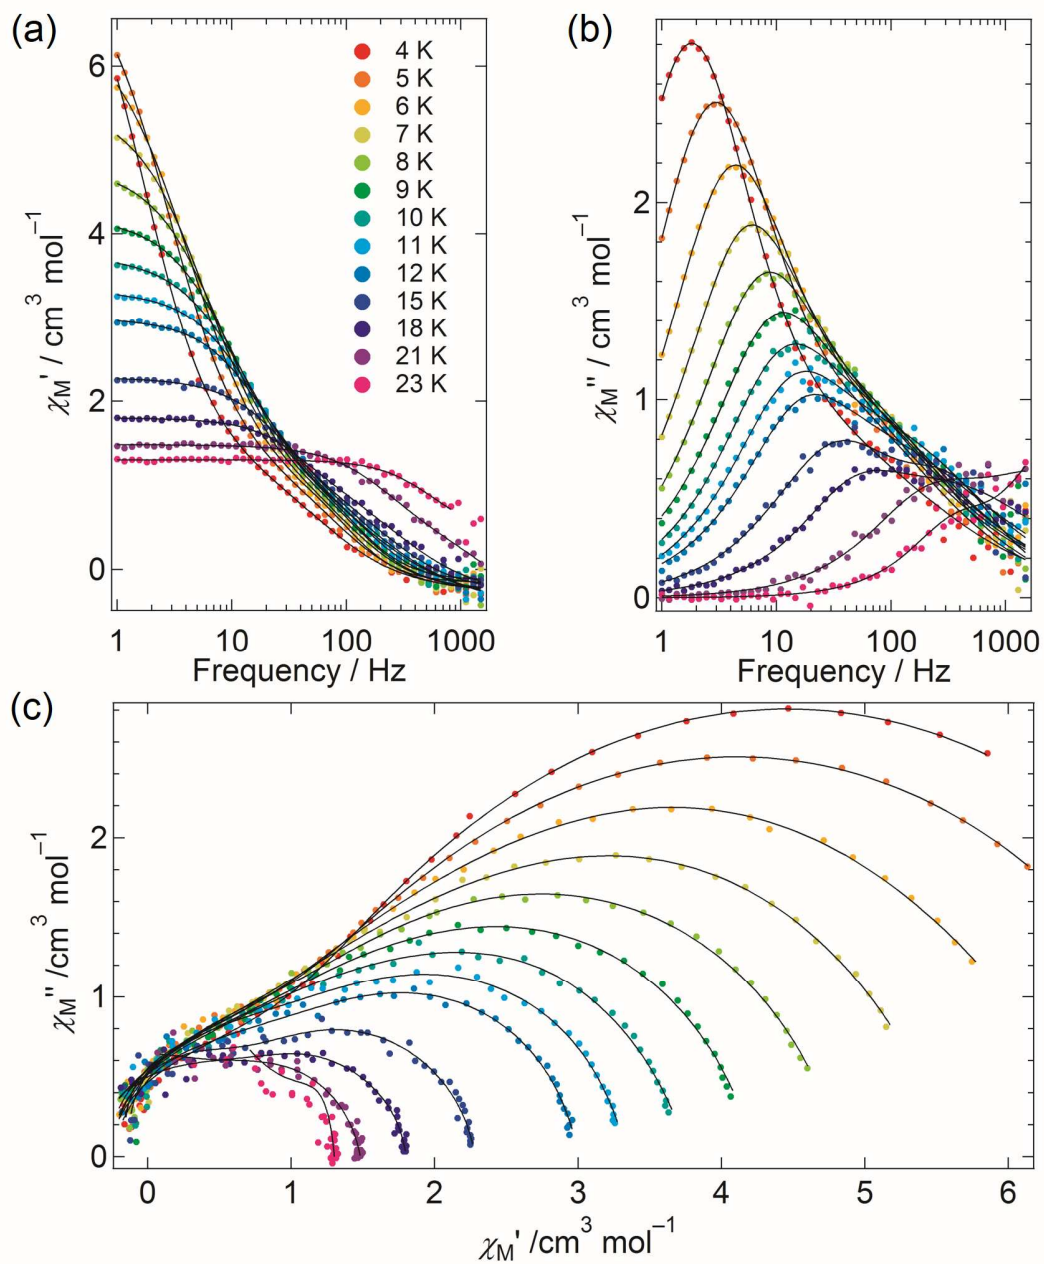

**Figure S17.** a)  $\chi_M'$  and b)  $\chi_M''$  versus  $f$  plots at 0.4 T and c) Argand plot for **2**. Black solid lines were fitted by using an extended Debye model.

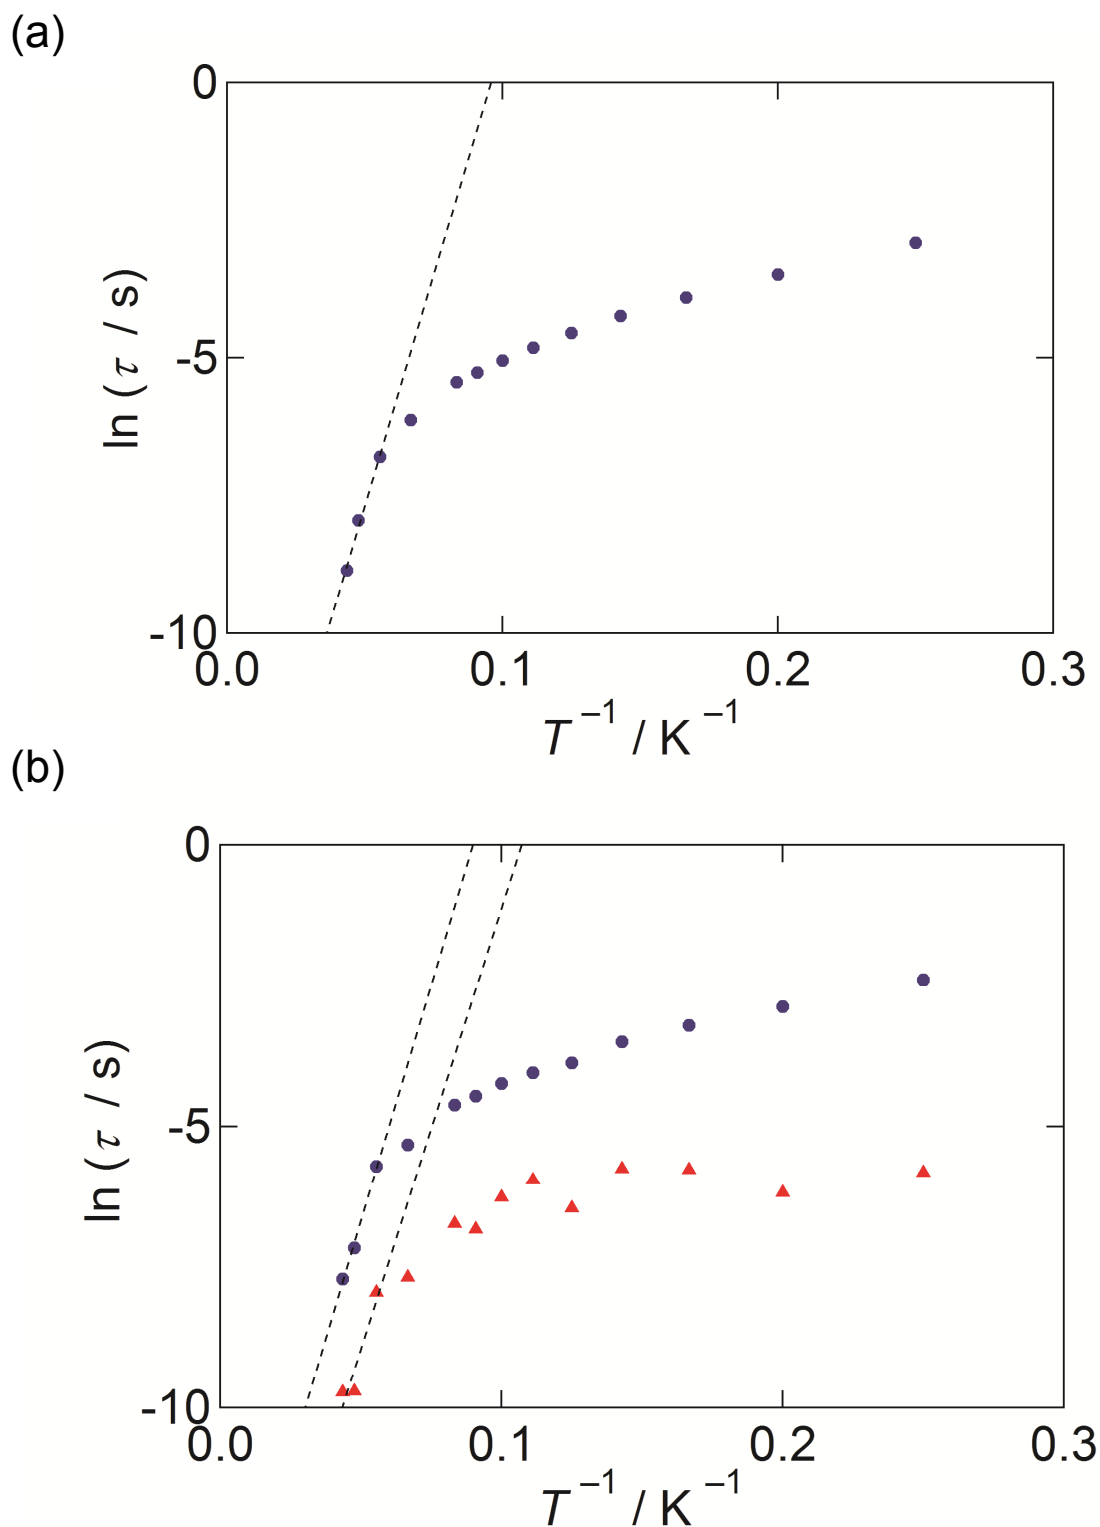

**Figure S18.** Arrhenius plot made by using the data of Figure (a) S16 and (b) S17 ( $\tau_1$ : high- $f$  part, red triangles,  $\tau_2$ : low- $f$  part, purple dots). Linear fitted parameters are as follows: (a)  $\Delta E = 117 \text{ cm}^{-1}$ ,  $\tau_0 = 1.1 \times 10^{-7} \text{ s}$ , (b)  $\Delta E = 117 \text{ cm}^{-1}$ ,  $\tau_0 = 2.9 \times 10^{-7} \text{ s}$  for  $\tau_1$  and  $\Delta E = 109 \text{ cm}^{-1}$ ,  $\tau_0 = 5.1 \times 10^{-8} \text{ s}$  for  $\tau_2$ .

[Eq.1]–[Eq.3] is the equations of the extended Debye model.

$$\chi(\omega) = \chi_s + \frac{\chi_T - \chi_s}{1 + (i\omega\tau)^{1-\alpha}} \quad [\text{Eq. 1}]$$

$$\chi'(\omega) = \chi_s + (\chi_T - \chi_s) \frac{1 + (\omega\tau)^{1-\alpha} \sin(\frac{\pi\alpha}{2})}{1 + 2(\omega\tau)^{1-\alpha} \sin(\frac{\pi\alpha}{2}) + (\omega\tau)^{2-2\alpha}} \quad [\text{Eq. 2}]$$

$$\chi''(\omega) = (\chi_T - \chi_s) \frac{(\omega\tau)^{1-\alpha} \cos(\frac{\pi\alpha}{2})}{1 + 2(\omega\tau)^{1-\alpha} \sin(\frac{\pi\alpha}{2}) + (\omega\tau)^{2-2\alpha}} \quad [\text{Eq. 3}]$$

[Eq.4]–[Eq.6] is the equations of the extended Debye model.

$$\chi(\omega) = \chi_s + \frac{\chi_T - \chi_s}{1 + (i\omega\tau_1)^{1-\alpha_1}} + \frac{\chi_T - \chi_s}{1 + (i\omega\tau_2)^{1-\alpha_2}} \quad [\text{Eq. 4}]$$

$$\begin{aligned} \chi'(\omega) = & k(\chi_s + (\chi_T - \chi_s) \frac{1 + (\omega\tau_1)^{1-\alpha_1} \sin(\frac{\pi\alpha_1}{2})}{1 + 2(\omega\tau_1)^{1-\alpha_1} \sin(\frac{\pi\alpha_1}{2}) + (\omega\tau_1)^{2-2\alpha_1}}) \\ & + (1-k)(\chi_s + (\chi_T - \chi_s) \frac{1 + (\omega\tau_2)^{1-\alpha_2} \sin(\frac{\pi\alpha_2}{2})}{1 + 2(\omega\tau_2)^{1-\alpha_2} \sin(\frac{\pi\alpha_2}{2}) + (\omega\tau_2)^{2-2\alpha_2}}) \end{aligned} \quad [\text{Eq. 5}]$$

$$\begin{aligned} \chi''(\omega) = & k(\chi_s + (\chi_T - \chi_s) \frac{(\omega\tau_1)^{1-\alpha_1} \cos(\frac{\pi\alpha_1}{2})}{1 + 2(\omega\tau_1)^{1-\alpha_1} \sin(\frac{\pi\alpha_1}{2}) + (\omega\tau_1)^{2-2\alpha_1}}) \\ & + (1-k)(\chi_s + (\chi_T - \chi_s) \frac{(\omega\tau_2)^{1-\alpha_2} \cos(\frac{\pi\alpha_2}{2})}{1 + 2(\omega\tau_2)^{1-\alpha_2} \sin(\frac{\pi\alpha_2}{2}) + (\omega\tau_2)^{2-2\alpha_2}}) \end{aligned} \quad [\text{Eq. 6}]$$
